# Supplementary material for: ESD Reviews: Climate feedbacks in the Earth system and prospects for their evaluation
Source: Copernicus journal article supplement (doi:10.5194/esd-10-379-2019), 2019-07-10
Supplement: Supplementary file 1 [file esd-10-379-2019-supplement.pdf]

Supplement of Earth Syst. Dynam., 10, 379–452, 2019  
<https://doi.org/10.5194/esd-10-379-2019-supplement>  
© Author(s) 2019. This work is distributed under  
the Creative Commons Attribution 4.0 License.

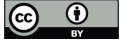

*Supplement of*

## **ESD Reviews: Climate feedbacks in the Earth system and prospects for their evaluation**

**Christoph Heinze et al.**

*Correspondence to:* Christoph Heinze ([christoph.heinze@uib.no](mailto:christoph.heinze@uib.no))

The copyright of individual parts of the supplement might differ from the CC BY 4.0 License.

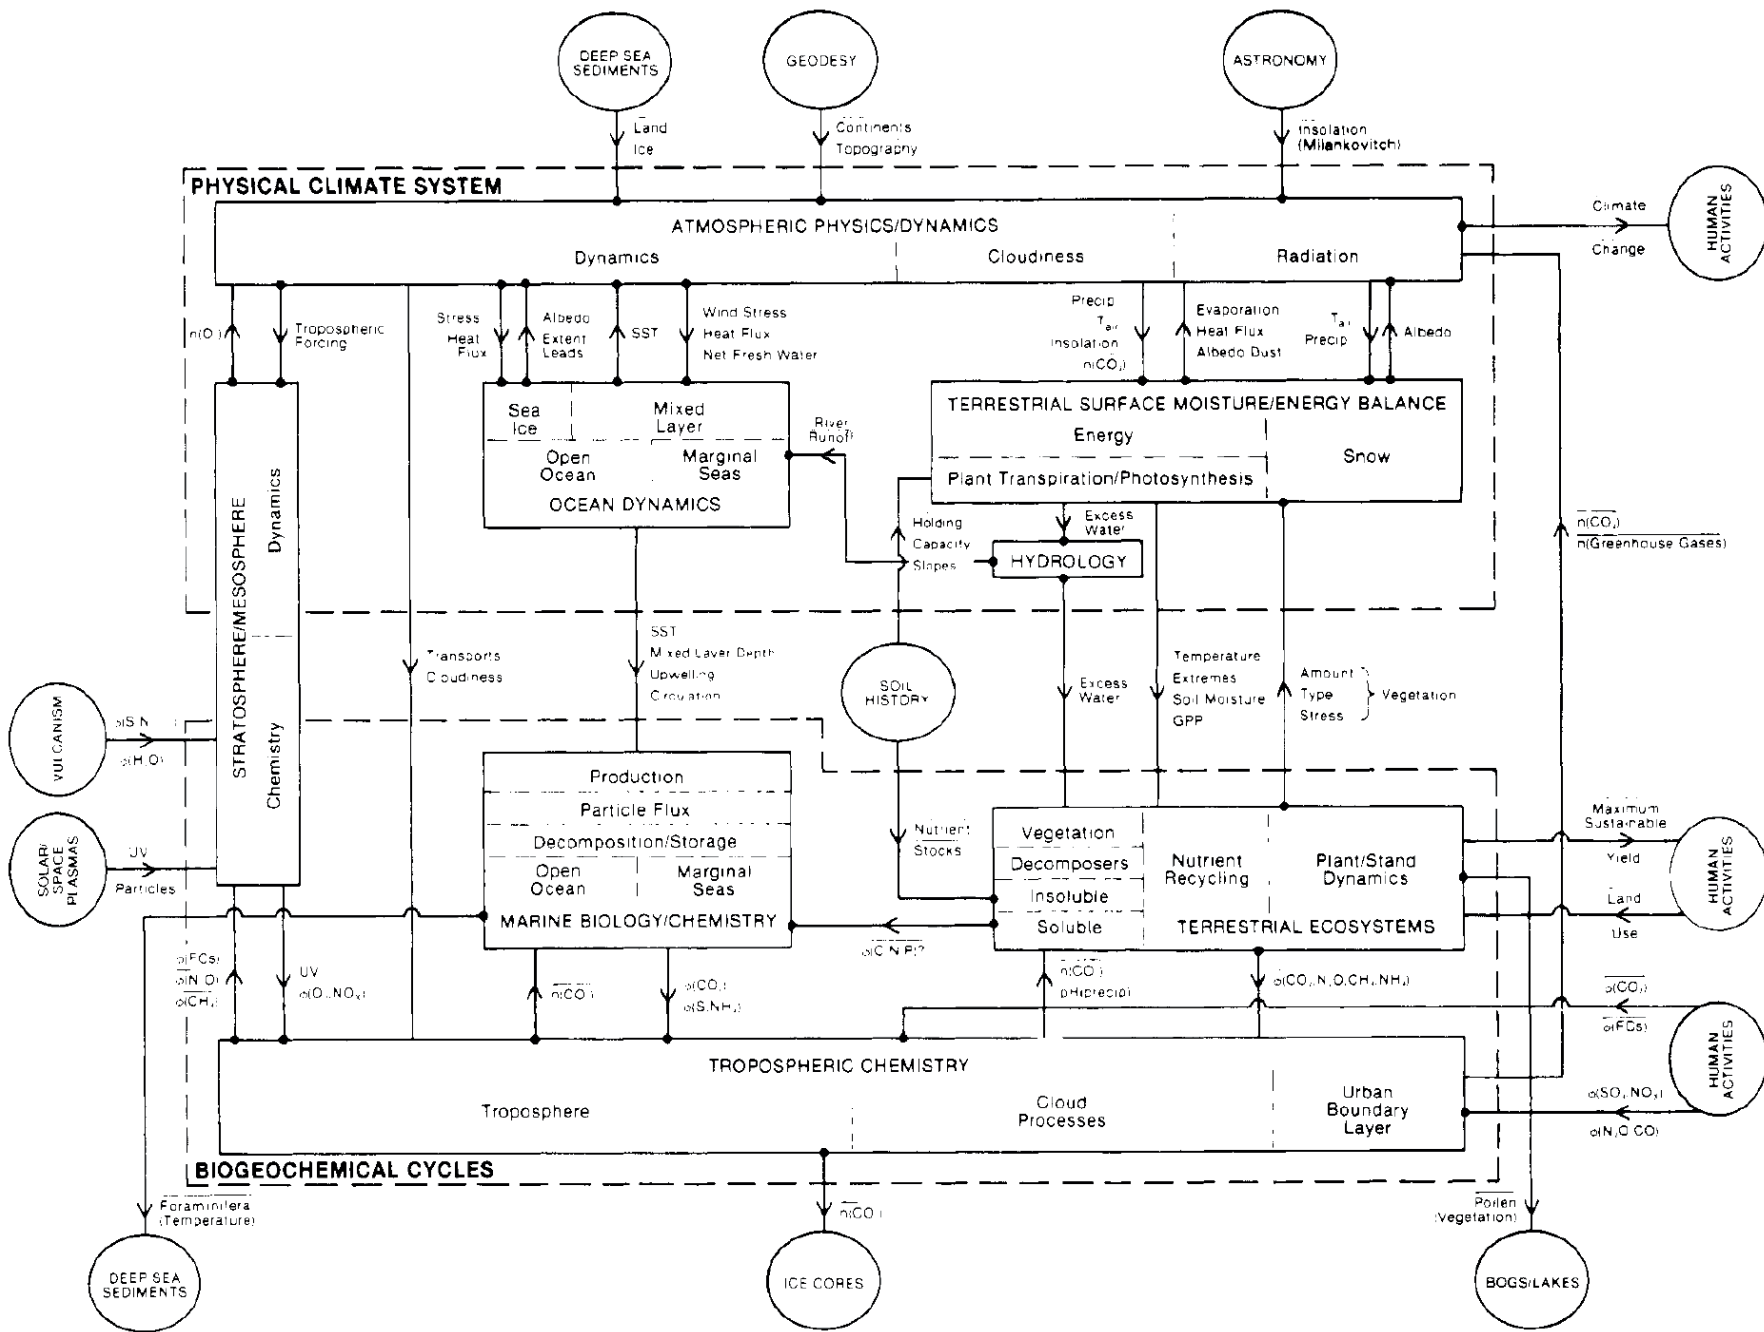

**Figure S1:** Detailed schematic of an Earth system model ("Bretherton diagram"). © [1985] IEEE. Reprinted, with permission, from Bretherton, F. P.: Earth System Science and Remote-Sensing, P. IEEE, 73, 1118–1133, <https://doi.org/10.1109/Proc.1985.13242>, 1985."
